# Supplementary material for: Using Pharmacokinetic–Pharmacodynamic Modeling to Study the Main Active Substances of the Anticancer Effect in Mice from Panax ginseng–Ophiopogon japonicus
Source: MDPI journal article supplement (doi:10.3390/molecules29020334), 2024-01-09
Supplement: s1 [file s1]

# Using Pharmacokinetic–Pharmacodynamic Modeling to Study the Main Active Substances of the Anticancer Effect in Mice from *Panax ginseng*–*Ophiopogon japonicus*

Lu Liu<sup>1,2</sup>, Jing Lyu<sup>1,3,4</sup>, Longfei Yang<sup>1,3,4</sup>, Yan Gao<sup>1,3,4</sup>\* and Bonian Zhao<sup>1,3,4</sup>\*

<sup>1</sup> Institute of Pharmaceutical Research, Shandong University of Traditional Chinese Medicine,

Jinan 250355, China; 2021100041@sdutcm.edu.cn (L.L.);

60230015@sdutcm.edu.cn (J.L.); 60230001@sdutcm.edu.cn (L.Y.)

<sup>2</sup> Innovation Research Institute of Traditional Chinese Medicine, Shandong University of Traditional Chinese Medicine, Jinan 250355, China

<sup>3</sup> Collaborative Innovation Center for Ecological Protection and High Quality Development of Characteristic Traditional Chinese Medicine in the Yellow River Basin, Jinan 250355, China

<sup>4</sup> High Level Traditional Chinese Medicine Key Disciplines of the State Administration of Traditional Chinese Medicine, Pharmaceutics of Traditional Chinese Medicine, Jinan 250355, China

\* Correspondence: 60230003@sdutcm.edu.cn (Y.G.); 60011983@sdutcm.edu.cn (B.Z.)

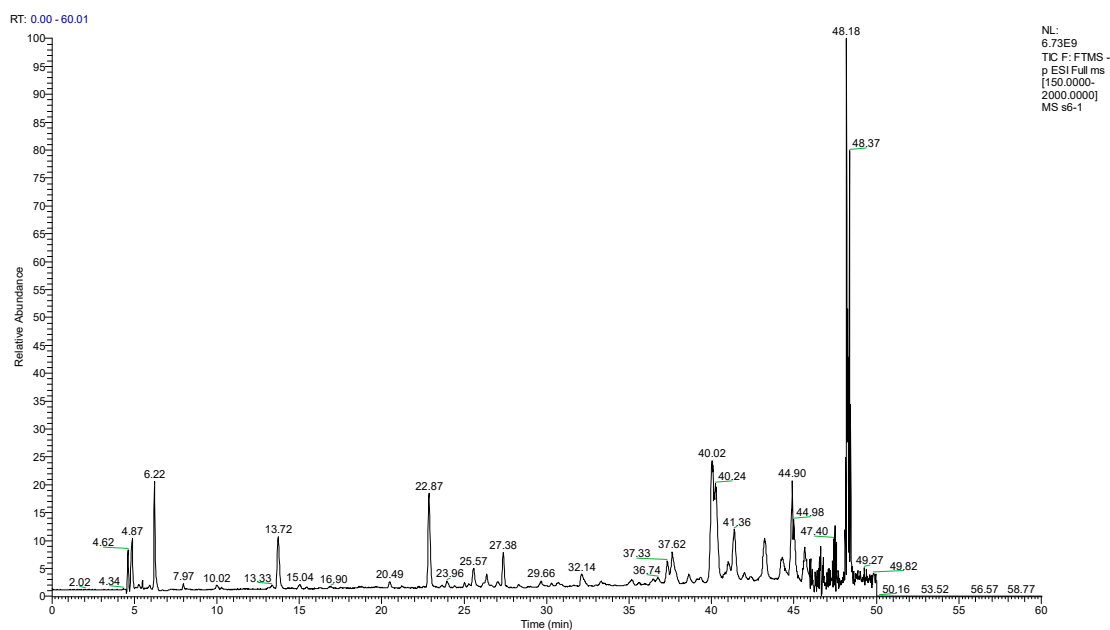

Figure S1. Total ion chromatogram of lung tissue samples in negative ion mode.

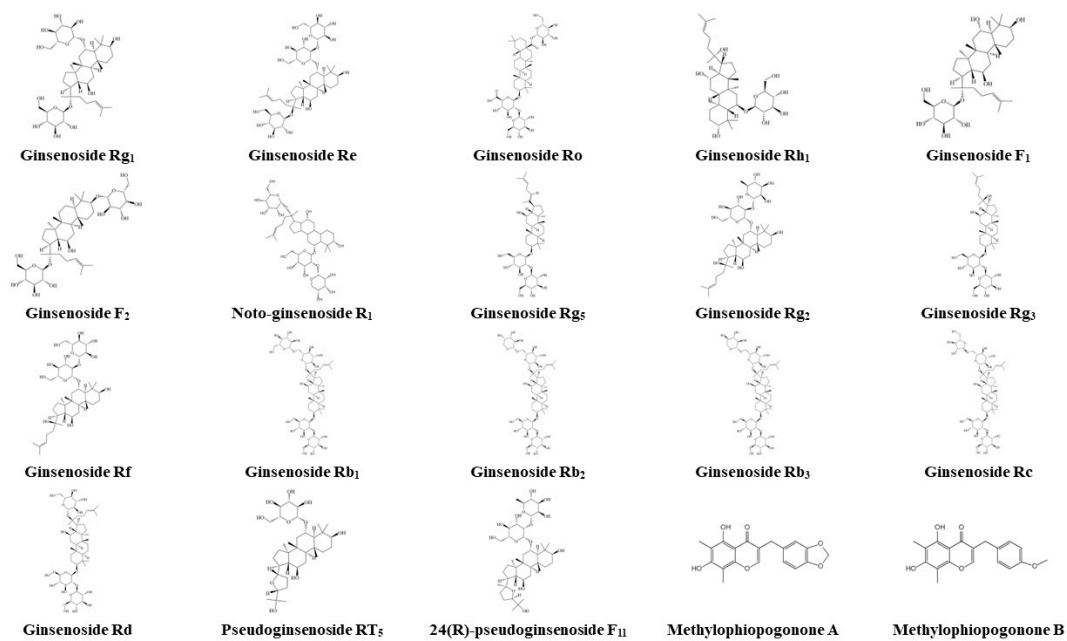

**Figure S2.** Chemical structures of the 20 compounds.

**Table S1.** The comprehensive weighted scoring of drug efficacy indicators.

| Time (h) | IFN- $\gamma$ | TNF- $\alpha$ | TGF- $\beta$ 1 | Combined Weighted Score (S) |
|----------|---------------|---------------|----------------|-----------------------------|
| 0.083    | 0.9418        | 0.9379        | 0.2634         | 0.1389                      |
| 0.167    | 0.1200        | 1.3515        | 0.6516         | 0.1924                      |
| 0.25     | 0.3715        | 0.4455        | 0.4645         | 0.0651                      |
| 0.5      | 0.3134        | 0.3145        | 1.3691         | 0.0810                      |
| 0.75     | 0.7140        | 0.2269        | 1.5642         | 0.0958                      |
| 1        | 0.6402        | 0.0542        | 0.7059         | 0.0491                      |
| 2        | 0.8941        | 0.1797        | 1.5414         | 0.0874                      |
| 3        | 1.2556        | 0.9594        | 2.2131         | 0.2158                      |
| 4        | 0.3165        | 0.1596        | 0.7663         | 0.0458                      |
| 6        | 0.2799        | 0.0593        | 0.7245         | 0.0194                      |
| 8        | 0.0361        | 0.0351        | 0.4682         | 0.0095                      |
| 12       | 0.0378        | 0.0369        | 0.4742         | 0.0154                      |
| 24       | 0.0385        | 0.04055       | 0.5016         | 0.0308                      |

**Table S2-1.** Detection results of drug-containing lung tissue content at different time points (mean  $\pm$  SD, n =6).

| Time (h) | Ginsenoside Rg <sub>1</sub> (ng/g) | Ginsenoside Re (ng/g) | Ginsenoside Ro (ng/g) | Ginsenoside Rh <sub>1</sub> (ng/g) | Ginsenoside F1 (ng/g) | Ginsenoside F2 (ng/g) | Notoginsenoside R1 (ng/g) | Ginsenoside Rg <sub>5</sub> (ng/g) | Ginsenoside Rg <sub>2</sub> (ng/g) | Ginsenoside Rg <sub>3</sub> (ng/g) |
|----------|------------------------------------|-----------------------|-----------------------|------------------------------------|-----------------------|-----------------------|---------------------------|------------------------------------|------------------------------------|------------------------------------|
| 0.083    | 41.21 $\pm$ 9.63                   | 132.49 $\pm$ 32.88    | 11.83 $\pm$ 0.79      | 8.29 $\pm$ 0.69                    | 0.42 $\pm$ 0.07       | 14.7 $\pm$ 0.96       | 5.86 $\pm$ 1.30           | 4135.21 $\pm$ 269.18               | 61.52 $\pm$ 2.18                   | 4.61 $\pm$ 0.20                    |
| 0.167    | 2.8 $\pm$ 0.1                      | 5.33 $\pm$ 0.56       | 1.69 $\pm$ 0.13       | 0.05 $\pm$ 0.04                    | 0.05 $\pm$ 0.03       | 1.84 $\pm$ 0.3        | 5.16 $\pm$ 2.87           | 386.08 $\pm$ 26.98                 | 8.29 $\pm$ 0.36                    | 3.45 $\pm$ 0.09                    |

|      |            |            |            |           |           |             |           |                |             |           |
|------|------------|------------|------------|-----------|-----------|-------------|-----------|----------------|-------------|-----------|
| 0.25 | 50.24±6.67 | 64.38±5.85 | 11.32±1.58 | 8.53±0.99 | 0.57±0.08 | 4.89±1.3    | 3.51±2.35 | 2348.06±325.95 | 67.24±10.16 | 3.91±0.16 |
| 0.5  | 9.25±1.73  | 55±21.54   | 3.65±0.5   | 1.4±0.66  | 0.15±0.06 | 6.12±3.57   | 3.46±1.15 | 658.61±156.18  | 17.29±1.44  | 3.85±0.25 |
| 0.75 | 4.95±0.04  | 5.83±0.04  | 1.4±0.05   | 2.79±0.05 | 0.46±0.04 | 17.18±0.13  | 0.03±0.04 | 4804.2±37.85   | 31.91±0.04  | 3.86±0.04 |
| 1    | 3.53±0.20  | 3.09±0.66  | 3.09±0.16  | 3.7±0.11  | 2.38±0.21 | 135.65±2.66 | 0.04±0.01 | 5679.31±158.09 | 52.13±1.23  | 4.34±0.19 |
| 2    | 0.82±0.06  | 1.54±0.11  | 1.39±0.05  | 0.31±0.02 | 0.11±0.02 | 3.7±1.03    | 5.17±0.37 | 136.75±14.00   | 7.15±0.24   | 3.98±0.73 |
| 3    | 3.19±0.35  | 12.42±0.27 | 2.03±0.43  | 1.6±0.25  | 1.46±0.18 | 45.74±2.56  | 6.4±1.28  | 2337.69±334.68 | 24.2±1.49   | 4.46±0.03 |
| 4    | 8.63±0.51  | 3.72±0.09  | 2.34±0.16  | 7.49±0.55 | 4.12±0.45 | 128.46±8.7  | 5.47±0.38 | 7967.81±441.77 | 69.08±2.87  | 4.41±0.29 |
| 6    | 0.58±0.02  | 1.7±0.15   | 1.35±0.13  | 0.42±0.01 | 0.27±0.01 | 2.55±0.73   | 2.22±0.12 | 81.51±18.10    | 6.00±0.09   | 3.4±0.08  |
| 8    | 0.4±0.02   | 0.77±0.04  | 1.33±0.01  | 0.47±0.02 | 0.25±0.01 | 1.55±0.09   | 0.58±0.05 | 138.3±22.36    | 6.04±0.03   | 3.39±0.05 |
| 12   | 0±0        | 0±0        | 0±0        | 0±0       | 0±0       | 0±0         | 0±0       | 0±0            | 0±0         | 0±0       |
| 24   | 0±0        | 0±0        | 0±0        | 0±0       | 0±0       | 0±0         | 0±0       | 0±0            | 0±0         | 0±0       |

**Table S2-2.** Detection results of drug-containing lung tissue content at different time points (mean ± SD, n =6).

| Time (h) | Ginsenoside Rf (ng/g) | Ginsenoside Rb <sub>1</sub> (ng/g) | Ginsenoside Rb <sub>2</sub> (ng/g) | Ginsenoside Rb <sub>3</sub> (ng/g) | Ginsenoside Rc (ng/g) | Ginsenoside Rd (ng/g) | Pseudoginsenoside RT <sub>5</sub> (ng/g) | 24(R)-pseudoginsenoside F11 | Methyloph iopogon flavanone A | Methyloph iopogon flavanone B |
|----------|-----------------------|------------------------------------|------------------------------------|------------------------------------|-----------------------|-----------------------|------------------------------------------|-----------------------------|-------------------------------|-------------------------------|
| 0.083    | 36.13±1.77            | 84.51±3.17                         | 2.22±0.15                          | 2.54±0.16                          | 17.39±0.64            | 43.37±1.94            | 2.62±0.23                                | 35.98±1.93                  | 6.21±5.23                     | 6.44±3.18                     |
| 0.167    | 2.22±0.12             | 10.62±2.98                         | 0.67±0.05                          | 1.63±0.05                          | 10.91±0.29            | 2.86±0.40             | 1.77±0.36                                | 1.98±0.11                   | 4.2±0.11                      | 4.54±0.80                     |
| 0.25     | 47.9±6.96             | 91.22±17.84                        | 1.9±0.29                           | 2.62±0.12                          | 16.7±1.45             | 34.48±2.62            | 5.11±0.88                                | 47.49±6.94                  | 2.04±0.29                     | 3.45±0.17                     |

|      |            |              |           |           |            |             |           |            |           |            |
|------|------------|--------------|-----------|-----------|------------|-------------|-----------|------------|-----------|------------|
| 0.5  | 9.09±1.97  | 34.9±13.81   | 1.01±0.10 | 1.84±0.01 | 13.87±0.58 | 71.57±12.27 | 3.38±0.76 | 9.23±1.73  | 2.33±0.27 | 4.37±0.60  |
| 0.75 | 8.08±0.04  | 4.52±0.04    | 0.72±0.04 | 1.53±0.04 | 1.31±0.04  | 2.93±0.04   | 1.79±0.04 | 7.8±0.04   | 2.95±0.04 | 4.9±0.04   |
| 1    | 8.87±0.20  | 26.77±1.71   | 0.92±0.08 | 1.74±0.04 | 0.92±0.15  | 23.56±0.34  | 1.46±0.07 | 10.44±0.94 | 2.76±0.16 | 1.58±0.53  |
| 2    | 1.25±0.20  | 5.33±0.56    | 1.09±0.17 | 1.54±0.06 | 3.89±0.13  | 2.57±0.10   | 1.31±0.09 | 3.83±0.21  | 2.06±0.11 | 2.12±0.17  |
| 3    | 5.27±0.26  | 128.72±5.25  | 1.17±0.26 | 1.68±0.10 | 1.75±0.90  | 9.88±0.30   | 1.71±0.10 | 7.58±0.28  | 5.41±0.92 | 20.61±2.38 |
| 4    | 18.78±0.77 | 25.54±1.63   | 0.79±0.02 | 1.54±0.02 | 2.32±0.20  | 17.81±1.40  | 2.28±0.12 | 21.21±0.93 | 2.92±0.10 | 3.51±0.66  |
| 6    | 0.37±0.02  | 14.85±0.45   | 0.69±0.01 | 1.44±0.02 | 4.05±0.04  | 2.86±0.18   | 1.64±0.06 | 2.82±0.01  | 2.04±0.07 | 2.09±0.89  |
| 8    | 0.12±0.01  | 8.75±0.16    | 0.69±0.01 | 1.44±0.03 | 4.16±0.01  | 1.74±0.02   | 1.46±0.08 | 2.62±0.05  | 2.32±0.38 | 1.54±0.20  |
| 12   | 0±0        | 440.68±15.67 | 7.2±0.96  | 5.92±0.45 | 42.95±2.11 | 82.95±2.11  | 0±0       | 0±0        | 0±0       | 0±0        |
| 24   | 0±0        | 5.51±0.36    | 0.78±0.06 | 1.79±0.08 | 2.35±0.89  | 3.16±0.54   | 0±0       | 0±0        | 0±0       | 0±0        |

**Table S3.** Reference substance concentration gradient and QC sample concentration.

| Components                     | Nominal<br>Concentration<br>(mg/g) | Concentrations of QC Samples (ng/g) |        |      |
|--------------------------------|------------------------------------|-------------------------------------|--------|------|
|                                |                                    | Low                                 | Medium | High |
| Ginsenoside Rg <sub>1</sub>    | 1.07                               | 5                                   | 50     | 500  |
| Ginsenoside Re                 | 0.98                               | 5                                   | 50     | 500  |
| Ginsenoside Ro                 | 1.06                               | 5                                   | 50     | 500  |
| Ginsenoside Rh <sub>1</sub>    | 1.01                               | 5                                   | 50     | 500  |
| Ginsenoside F <sub>1</sub>     | 1.11                               | 5                                   | 50     | 500  |
| Ginsenoside F <sub>2</sub>     | 0.97                               | 5                                   | 50     | 500  |
| Notoginsenoside R <sub>1</sub> | 1.07                               | 5                                   | 50     | 500  |
| Ginsenoside Rg <sub>5</sub>    | 1.00                               | 5                                   | 50     | 500  |
| Ginsenoside Rg <sub>2</sub>    | 1.18                               | 5                                   | 50     | 500  |

|                                         |      |   |    |     |
|-----------------------------------------|------|---|----|-----|
| Ginsenoside Rg <sub>3</sub>             | 1.12 | 5 | 50 | 500 |
| Ginsenoside Rf                          | 1.06 | 5 | 50 | 500 |
| Ginsenoside Rb <sub>1</sub>             | 1.03 | 5 | 50 | 500 |
| Ginsenoside Rb <sub>2</sub>             | 0.93 | 5 | 50 | 500 |
| Ginsenoside Rb <sub>3</sub>             | 1.01 | 5 | 50 | 500 |
| Ginsenoside Rc                          | 1.05 | 5 | 50 | 500 |
| Ginsenoside Rd                          | 1.04 | 5 | 50 | 500 |
| Pseudoginsenoside RT <sub>5</sub>       | 1.11 | 5 | 50 | 500 |
| 24(R)-pseudoginsenoside F <sub>11</sub> | 1.03 | 5 | 50 | 500 |
| Methylophiopogon flavanone A            | 0.95 | 5 | 50 | 500 |
| Methy ophiopogon flavanone B            | 0.97 | 5 | 50 | 500 |

---
